# Supplementary material
Source: PubMed Central journal article supplement (PMC4651012)

## Colon tissue

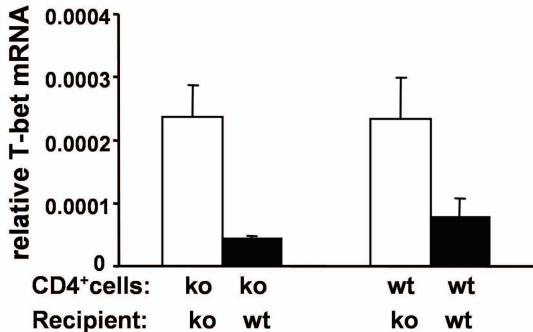

Supplement: NIHMS735852-supplement-suppl_fig_1.pdf [file NIHMS735852-supplement-suppl_fig_1.pdf]

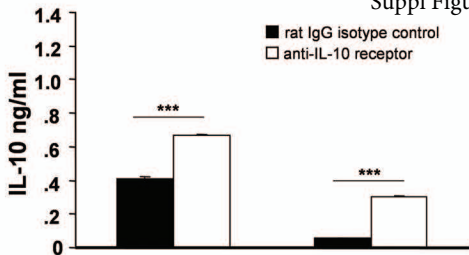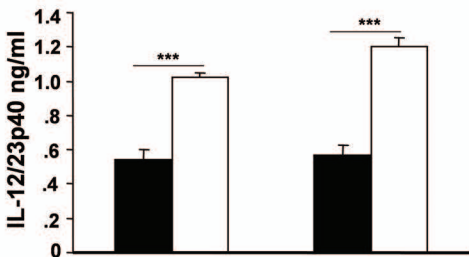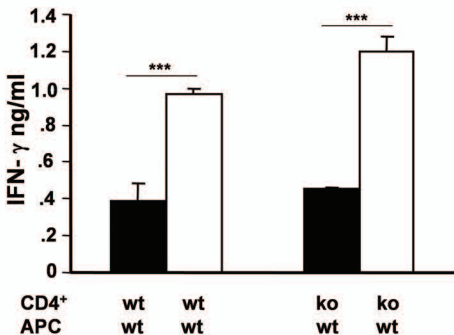

Supplement: NIHMS735852-supplement-suppl_fig_2.pdf [file NIHMS735852-supplement-suppl_fig_2.pdf]

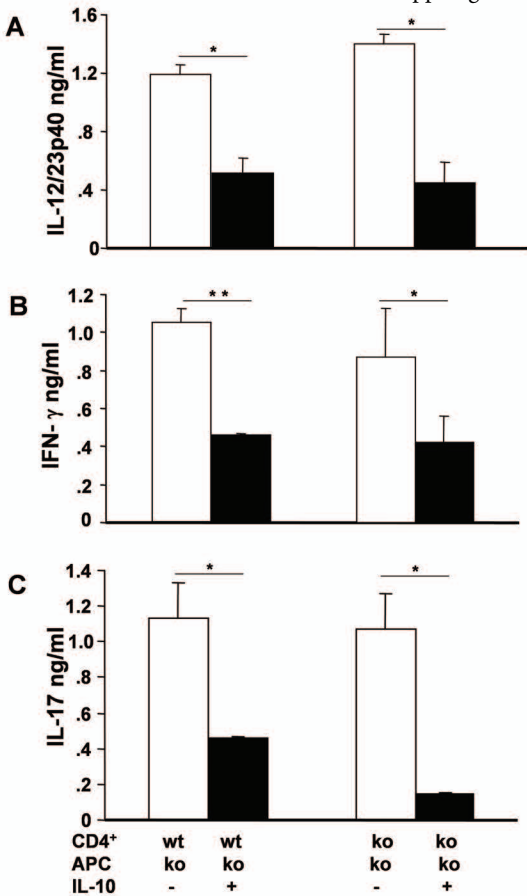

Supplement: NIHMS735852-supplement-suppl_fig_3.pdf [file NIHMS735852-supplement-suppl_fig_3.pdf]
